# Supplementary material
Source: publisher figshare collection journal article supplement (https://gsajournals.figshare.com/ndownloader/files/10998401)
Supplement: Supplementary file 1 [file 10998401]

## Sheet: Sheet1
GO Term Description	p-value	Our genes annotated to this class	Total genes annotated to this class
stereocilium	0.00141	3	18
stereocilium bundle	0.00218	3	21
postsynaptic density	0.00313	5	81
postsynaptic specialization	0.00313	5	81
asymmetric synapse	0.00365	5	84
neuron to neuron synapse	0.00365	5	84
neuron part	0.00443	15	578
dynein complex	0.00825	3	34
cluster of actin-based cell projections	0.00949	4	68
microtubule plus-end	0.0119	1	1
C zone	0.0119	1	1
cytoplasmic side of mitochondrial outer membrane	0.0119	1	1
microtubule end	0.0119	1	1
ciliary part	0.0159	5	121
plasma membrane part	0.0187	31	1758
non-membrane-bounded organelle	0.0198	40	2414
intracellular non-membrane-bounded organelle	0.0198	40	2414
plus-end kinesin complex	0.0237	1	2
chiasma	0.0237	1	2
striated muscle myosin thick filament	0.0237	1	2
hydrogen:potassium-exchanging ATPase complex	0.0237	1	2
MutLalpha complex	0.0237	1	2
collagen type VI trimer	0.0237	1	2
collagen beaded filament	0.0237	1	2
microtubule associated complex	0.0264	4	93
plasma membrane region	0.0284	12	534
postsynapse	0.0305	6	194
proteinaceous extracellular matrix	0.0308	8	303
cell body fiber	0.0353	1	3
collagen type V trimer	0.0353	1	3
postsynaptic membrane	0.0355	5	150
organelle part	0.0417	68	4705
extracellular matrix	0.0448	8	327
photoreceptor cell cilium	0.045	2	28
9+0 non-motile cilium	0.045	2	28
cilium	0.0457	5	161
microtubule cytoskeleton	0.0465	12	577
apicolateral plasma membrane	0.0468	1	4
hemidesmosome	0.0468	1	4
mismatch repair complex	0.0582	1	5
neuron projection	0.0617	9	412
synaptic membrane	0.0621	5	176
collagen trimer	0.0634	2	34
actin-based cell projection	0.0643	3	76
chromosome	0.0665	10	482
non-motile cilium	0.0667	2	35
intracellular organelle part	0.0717	65	4606
synapse part	0.0771	7	306
cell periphery	0.0812	53	3691
plasma membrane	0.0832	52	3619
plasma membrane bounded cell projection	0.0912	13	716
nuclear lumen	0.0959	21	1292
extracellular matrix component	0.0972	3	91
synapse	0.1	8	391
catalytic complex	0.104	13	733
nuclear part	0.107	25	1607
cell projection	0.109	13	739
cation-transporting ATPase complex	0.113	1	10
banded collagen fibril	0.113	1	10
fibrillar collagen trimer	0.113	1	10
integral component of plasma membrane	0.116	19	1178
cytoplasmic side of membrane	0.121	2	50
chromosomal part	0.122	8	410
extracellular region part	0.125	16	972
extracellular region	0.129	30	2023
intrinsic component of plasma membrane	0.131	19	1199
ATPase complex	0.133	2	53
intracellular organelle lumen	0.159	25	1690
membrane-enclosed lumen	0.16	25	1691
organelle lumen	0.16	25	1691
cytoskeleton	0.169	20	1323
myofilament	0.175	1	16
DNA repair complex	0.175	1	16
organelle	0.181	119	9360
kinesin complex	0.184	1	17
myosin filament	0.184	1	17
A band	0.184	1	17
ATPase dependent transmembrane transport complex	0.184	1	17
muscle myosin complex	0.184	1	17
myosin II complex	0.184	1	17
complex of collagen trimers	0.194	1	18
cytoskeletal part	0.195	14	901
mitochondrial membrane part	0.209	3	131
nuclear chromosome part	0.272	3	151
cell part	0.278	165	13456
cell	0.279	165	13457
cell-substrate junction	0.28	2	87
cell junction	0.29	8	522
supramolecular fiber	0.33	9	622
membrane	0.335	89	7138
membrane part	0.339	74	5902
supramolecular polymer	0.342	9	629
supramolecular complex	0.344	9	630
intracellular organelle	0.358	114	9257
contractile fiber part	0.372	2	108
myofibril	0.376	2	109
side of membrane	0.386	3	186
nuclear chromosome	0.389	3	187
contractile fiber	0.409	2	117
actin cytoskeleton	0.419	4	275
microtubule	0.419	4	275
integral component of membrane	0.431	64	5208
cell projection part	0.449	5	367
plasma membrane bounded cell projection part	0.449	5	367
intrinsic component of membrane	0.45	65	5317
condensed nuclear chromosome	0.458	1	51
nucleus	0.467	63	5175
myosin complex	0.519	1	61
transmembrane transporter complex	0.544	3	238
polymeric cytoskeletal fiber	0.546	6	495
mitochondrial membrane	0.551	5	412
envelope	0.559	8	673
transporter complex	0.561	3	244
organelle membrane	0.594	17	1467
mitochondrial part	0.601	7	611
mitochondrial envelope	0.601	5	436
protein complex	0.615	18	1571
macromolecular complex	0.664	32	2822
mitochondrion	0.668	14	1272
mitochondrial outer membrane	0.669	1	92
sarcomere	0.673	1	93
organelle envelope	0.679	7	659
membrane-bounded organelle	0.692	97	8344
organelle outer membrane	0.74	1	112
intracellular part	0.74	127	10906
outer membrane	0.755	1	117
bounding membrane of organelle	0.777	10	1012
intracellular membrane-bounded organelle	0.785	89	7845
condensed chromosome	0.791	1	130
intracellular	0.801	130	11259
cytoplasm	0.902	83	7635
cytoplasmic part	0.942	51	5052
whole membrane	0.98	4	744
cellular_component	1	196	16352
